# Supplementary material for: Aggregation of low-concentration dirhamnolipid biosurfactant in electrolyte solution
Source: Royal Society of Chemistry journal article supplement (doi:10.1039/c5ra16817a), 2015-01-01
Supplement: c5ra16817a1.pdf [file c5ra16817a1.pdf]

**Supplementary Information**

**Aggregation of low-concentration dirhamnolipid biosurfactant in  
electrolyte solution**

Hua Zhong <sup>a, b, c\*</sup>, Lei Yang<sup>a, b</sup>, Xin Yang<sup>a, b</sup>, Guangming Zeng<sup>a, b\*</sup>, Zhifeng Liu<sup>a, b</sup>,  
Yang Liu<sup>a, b</sup>, Xingzhong Yuan<sup>a, b</sup>

<sup>a</sup> College of Environmental Science and Engineering, Hunan University, Changsha  
410082, P. R.China

<sup>b</sup> Key Laboratory of Environmental Biology and Pollution Control (Hunan  
University), Ministry of Education, Changsha 410082, P. R. China

<sup>c</sup> Department of Soil, Water and Environment Science, The University of Arizona,  
Tucson, AZ 85721, US

Submitted to:

***RSC Advances***

19 August 2015

\* Corresponding author

Hua Zhong

Email: zhonghua@email.arizona.edu;

Current address: Department of Soil, Water and Environmental Science, University of  
Arizona, Tucson, Arizona 85721

Guangming Zeng

Email: zgming@hnu.edu.cn

Current address: College of Environmental Science and Engineering, Hunan University,  
Changsha 410082, P. R.China

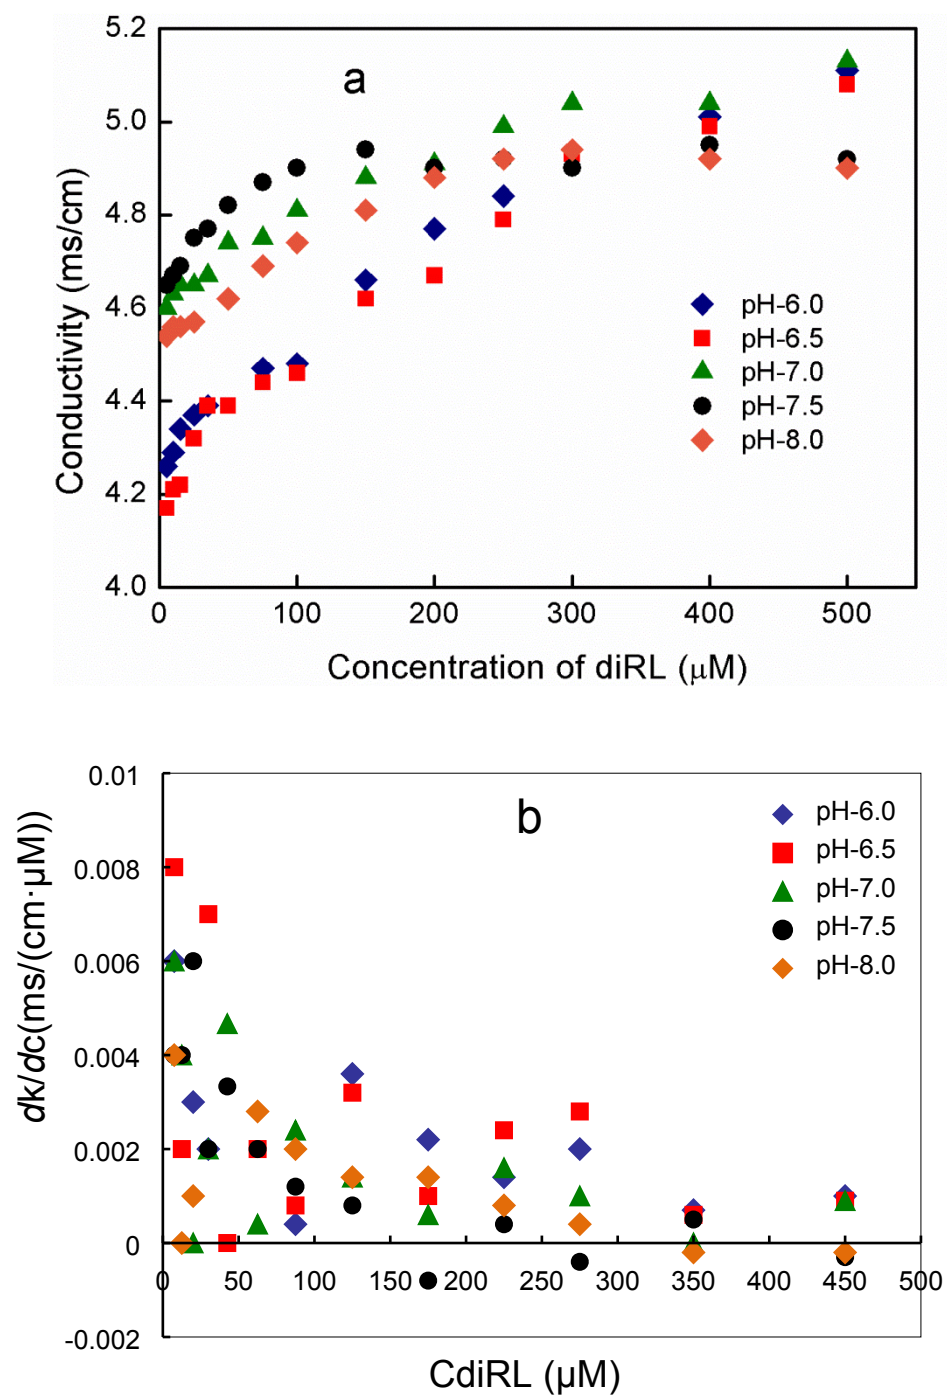

Figure S1. (a) Electrical conductivity versus diRL concentration in PBSS. (b) Conductivity derivative versus diRL concentration in PBSS.

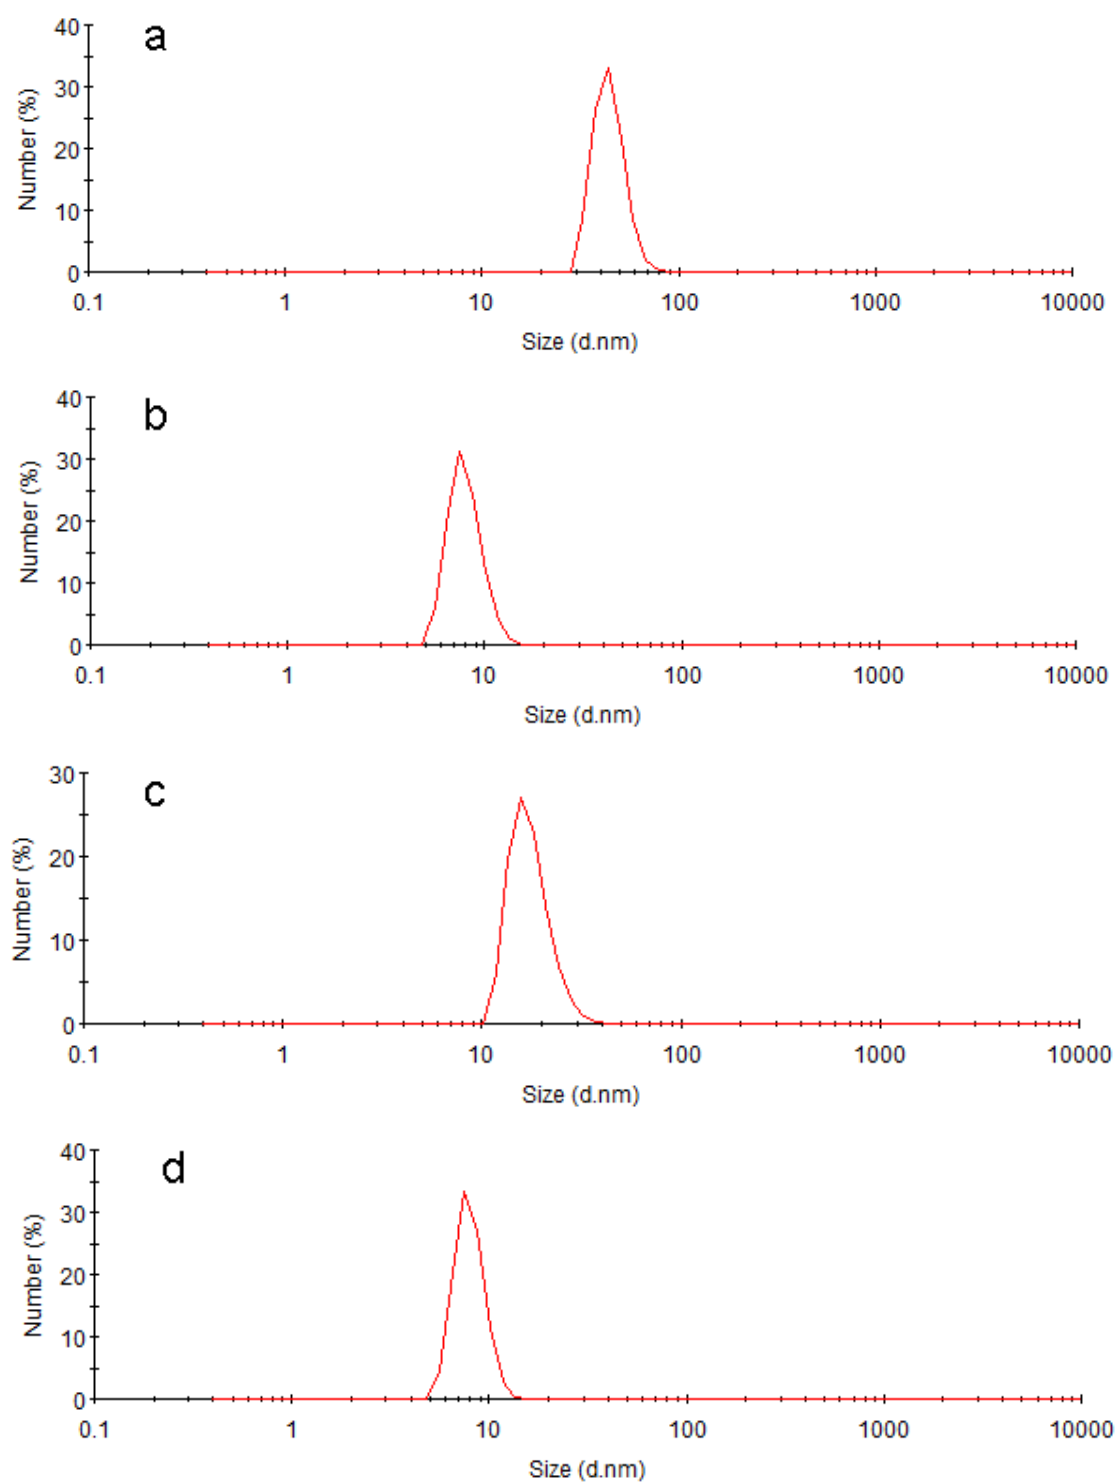

Figure S2. DLS-based number PSD profiles generated by Malvern DTS Nano software for diRL aggregates in PBSS. (a) 25  $\mu$ M, pH 6.0; (b) 250  $\mu$ M, pH 6.0; (c) 25  $\mu$ M, pH 8.0; (d) 250  $\mu$ M, pH 8.0

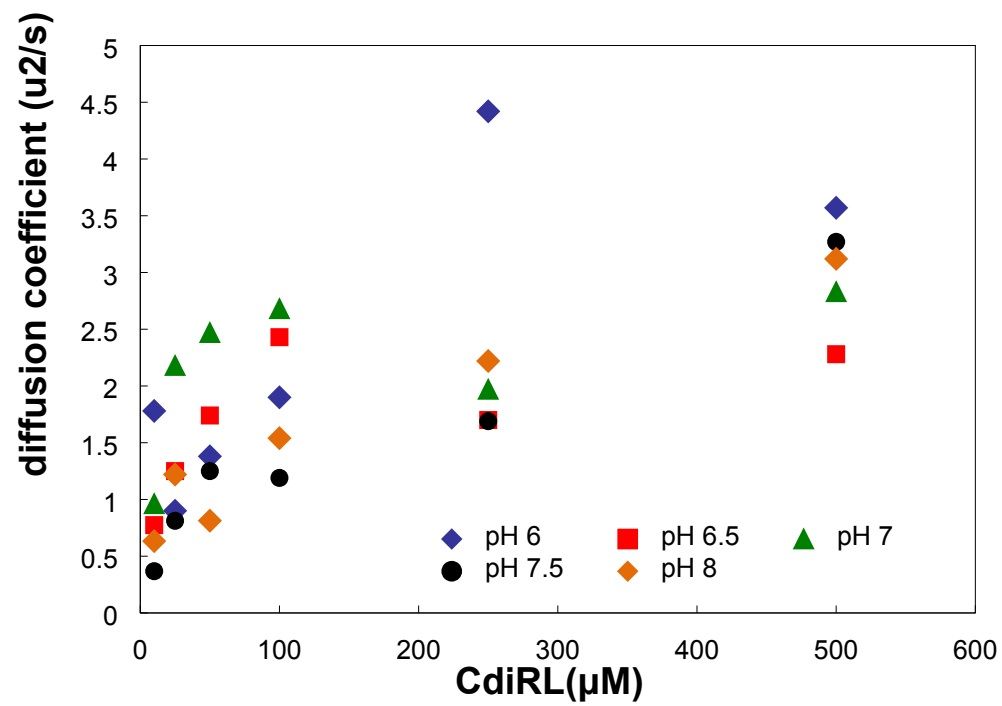

Figure S3. DLS diffusion coefficient versus diRL concentration in PBSS

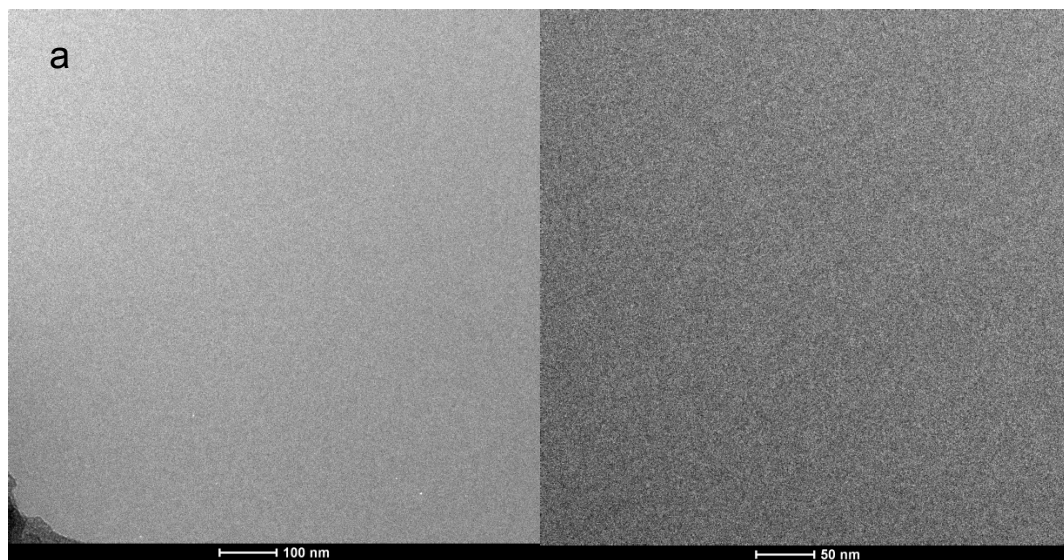

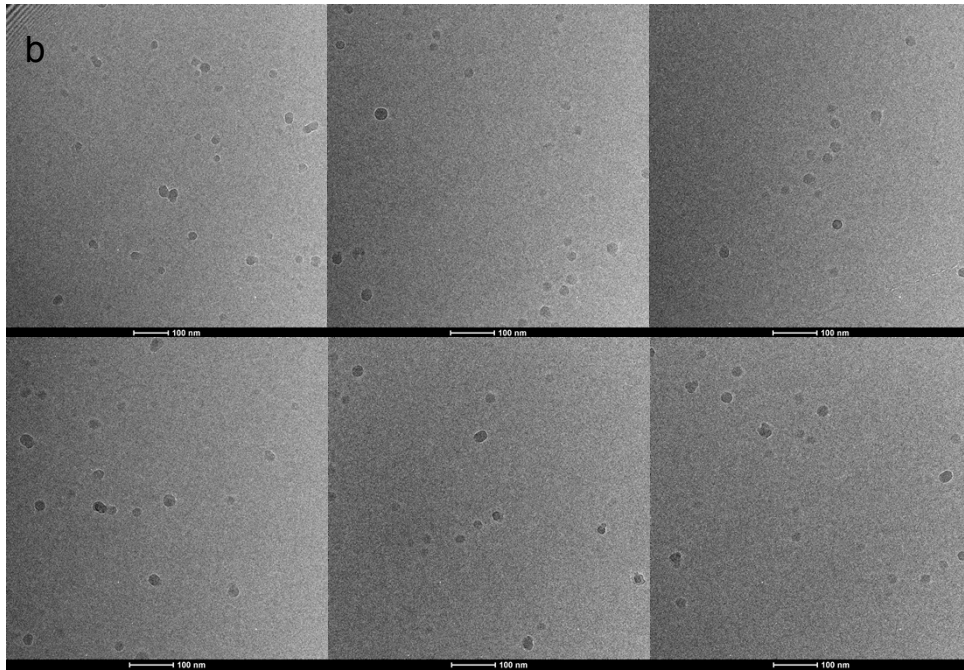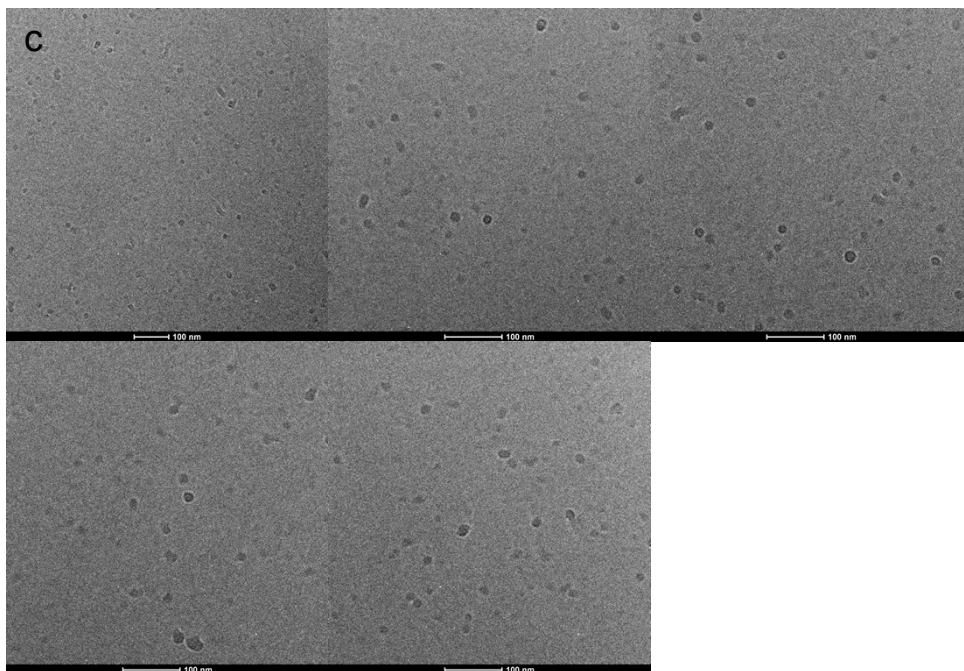

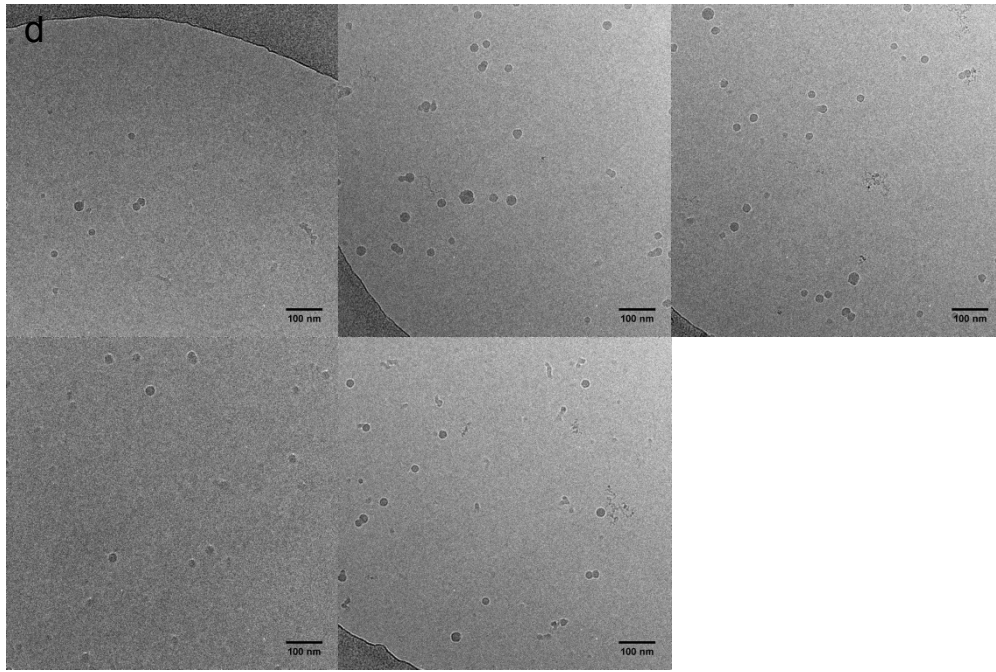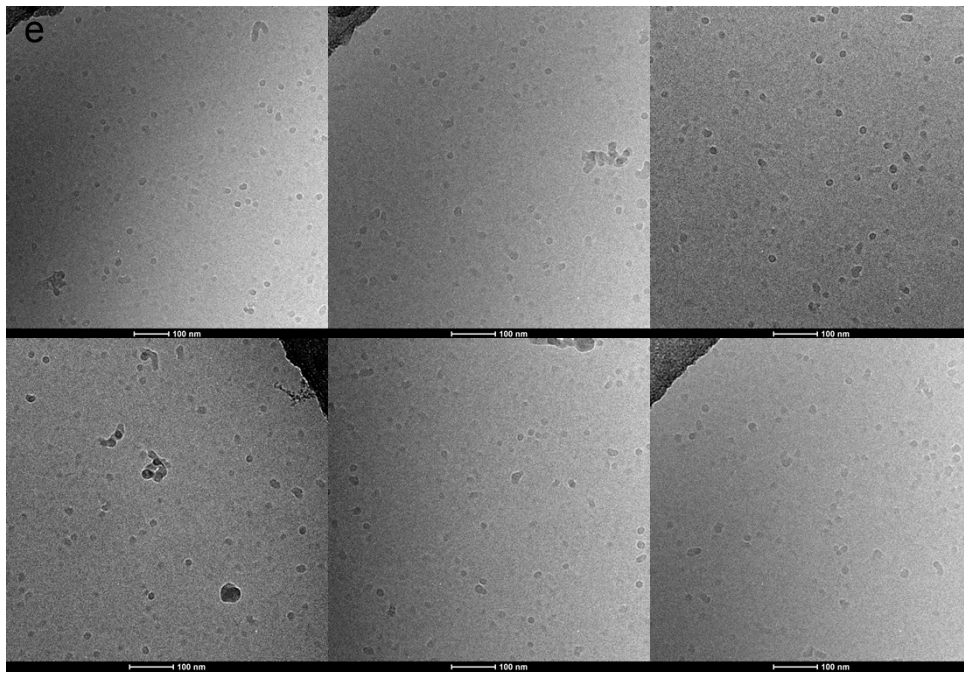

Figure S4. Cryo-TEM micrographs of diRL aggregates in PBSS. (a) no diRL; (b) 25  $\mu$ M, pH 6.0; (c) 250  $\mu$ M, pH 6.0; (d) 25  $\mu$ M, pH 8.0; (e) 250  $\mu$ M, pH 8.0.
